# Supplementary material
Source: HighWire-hosted journal article supplement (https://jnm.snmjournals.org/highwire/filestream/94287/field_highwire_adjunct_files/0/95653_Supplemental_Data.pdf)
Supplement: 95653_Supplemental_Data.pdf [file 95653_Supplemental_Data.pdf]

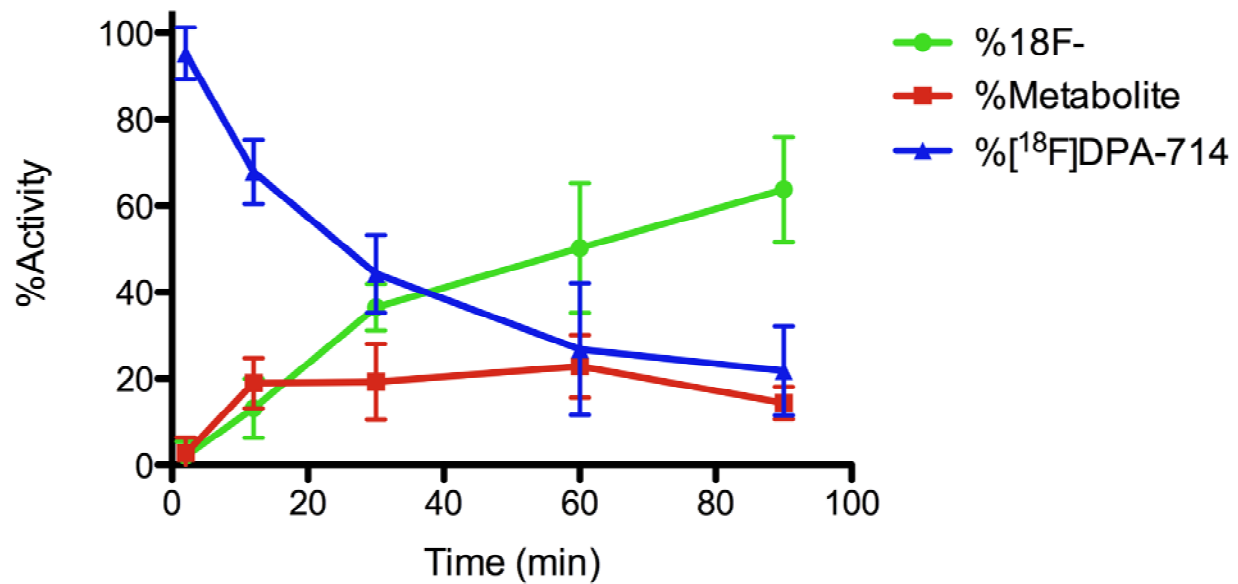

SUPPLEMENTAL FIGURE 1. Mean relative quantities of measured radiometabolites for [<sup>18</sup>F]DPA-714 from multiple dynamic PET studies in rats (*MEAN ± SD*).

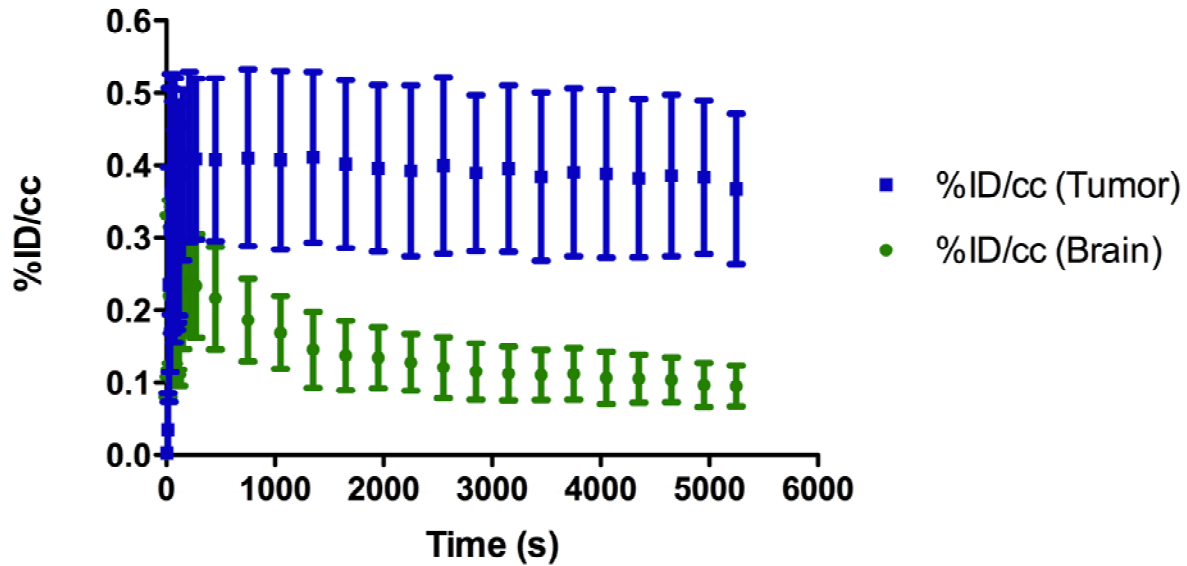

SUPPLEMENTAL FIGURE 2. Time-activity curves (TACs) derived from nine 90-min dynamic studies with [ $^{18}\text{F}$ ]DPA-714 in C6 glioma bearing rats (*MEAN*  $\pm$  *SD*).

**SUPPLEMENTAL TABLE 1. [<sup>18</sup>F]DPA-714 Uptake in Different Tissues (Last 30 min of Dynamic Scan)**

|                    | <b>%ID/cc<br/>(Brain)</b> | <b>%ID/cc<br/>(Tumor)</b> | <b>%ID/cc<br/>(Skull)</b> | <b>%ID/cc<br/>(Harderian<br/>Gland)</b> | <b>Ratio<br/>(Tumor/Brain)</b> |
|--------------------|---------------------------|---------------------------|---------------------------|-----------------------------------------|--------------------------------|
| <b>Mean (N=11)</b> | 0.088                     | 0.331                     | 0.301                     | 0.484                                   | 3.828                          |
| <b>SD (N=11)</b>   | 0.033                     | 0.109                     | 0.091                     | 0.177                                   | 0.645                          |
